# Supplementary material
Source: publisher figshare collection journal article supplement (https://acs.figshare.com/ndownloader/files/12710468)
Supplement: Supplementary file 1 [file 12710468]

# Supporting Information

## Observation of Olefin/Paraffin Selectivity in Azo Compound and Its Application into a Metal-Organic Framework

Seo-Yul Kim,<sup>a</sup> Tae-Ung Yoon,<sup>a</sup> Jo Hong Kang,<sup>a</sup> Ah-Reum Kim,<sup>a</sup> Tea-Hoon Kim,<sup>a</sup> Seung-Ik Kim,<sup>a</sup>

Wanje Park,<sup>a</sup> Ki Chul Kim<sup>b,\*</sup> and Youn-Sang Bae<sup>a,\*</sup>

<sup>a</sup> Department of Chemical and Biomolecular Engineering, Yonsei University, 50 Yonsei-ro,  
Seodaemun-gu, Seoul, 03722, Korea

<sup>b</sup> Department of Chemical Engineering, Konkuk University, Seoul, 05029, Republic of Korea

E-mail: [mowbae@yonsei.ac.kr](mailto:mowbae@yonsei.ac.kr) (Youn-Sang Bae), [kich2018@konkuk.ac.kr](mailto:kich2018@konkuk.ac.kr) (Ki Chul Kim)

## **<Experimental details>**

### **NMR**

MIL-101(Cr) and MIL-101(Cr)\_DAA samples were digested for nuclear magnetic resonance (NMR) spectroscopy measurements. Activated samples were immersed in 2 M NaOH solutions and then were ultrasonicated for 30 min. From the resulting slurries, water was removed through evaporation. The resulting powders were immersed in dimethyl sulfoxide-d<sub>6</sub> (Sigma Aldrich). After the remaining crystals were excluded by a syringe filter, MIL-101(Cr) and MIL-101(Cr)\_DAA samples were digested for nuclear magnetic resonance (NMR) spectroscopy measurements.

### **Breakthrough experiments**

The breakthrough experiments were carried out in a custom-built fixed-bed experimental set up. Four mass flow controllers (0~100 ml/min) (Bronkhorst, Germany) were used to regulate the gas flow rates. Three of them were used for pure propylene, propane and helium streams, which were mixed well with each other by flowing through a gas mixer. The first combination made helium/propylene/propane mixtures and the other one was used for the helium stream for in situ regeneration of the adsorbent packed in the column. The column was placed in a ventilated thermostatic oven for measurements at a constant temperature. The composition of the gas flow at the outlet of the column was measured online with a Max300-LG mass spectrometer (Extrel, USA). To avoid large pressure drops, the powder sample was pelletized using a Carver press (Carver, Inc., USA). As-synthesized powders were put into a die with an inner diameter of 13 mm and pressed at 0.5 ton for approximately 1 min. The obtained solid disk was then crushed and sieved to obtain binderless pellets with a size of 500~1000  $\mu\text{m}$ . The pellets were initially activated at 423 K for 12 h under vacuum. The activated pellets were then packed into a stainless-steel column with a length of

15 cm and an internal diameter of 0.44 cm. The column was then degassed by a He flow of 100 ml/min at 423 K for 60 min to remove all the impurities adsorbed during the packing procedure. All the experiments were carried out at 303 K and 1 bar. Before each measurement, a He flow of 100 ml/min at 303 K was introduced into the column for at least 20 min. At  $t = 0$ , the He flow was switched to a flow of helium/propylene/propane mixture (helium/propylene/propane = 92/4/4, total flow rate = 100 ml/min).

**Table S1.** Elemental analyses for MIL-101(Cr) and MIL-101(Cr)\_DAA

|                 | C (%) | N (%) | N/C<br>from EA | N/C<br>from NMR |
|-----------------|-------|-------|----------------|-----------------|
| MIL-101(Cr)     | 39.2  | ND*   | 0              | 0               |
| MIL-101(Cr)_DAA | 35    | 1.94  | 0.0554         | 0.0718          |

\* Not detected.

**Table S2.** Comparisons with other benchmark adsorbents.

| Adsorbent                           | q (mmol/g)<br>at 100 kPa      |                               | q(C <sub>3</sub> H <sub>6</sub> )<br>/q(C <sub>3</sub> H <sub>8</sub> ) | IAST<br>selectivity<br>(50:50) <sup>4</sup> | Working<br>capacity<br>(mmol/g)<br>10-100 kPa | Ref              |
|-------------------------------------|-------------------------------|-------------------------------|-------------------------------------------------------------------------|---------------------------------------------|-----------------------------------------------|------------------|
|                                     | C <sub>3</sub> H <sub>6</sub> | C <sub>3</sub> H <sub>8</sub> |                                                                         |                                             |                                               |                  |
| Zeolite 13X <sup>1</sup>            | 3.44                          | 3.03                          | 1.14                                                                    | 12.6                                        | 0.42                                          | [1]              |
| HKUST-1 <sup>1</sup>                | 6.63                          | 5.81                          | 1.14                                                                    | 3.3                                         | 1.7                                           | [2]              |
| Cu(0.6)@MIL-100(Fe) <sup>1</sup>    | 4.52                          | 3.37                          | 1.34                                                                    | 11.7                                        | 1.52                                          | [3]              |
| Co-MOF-74 <sup>2</sup>              | 7.34                          | 5.48                          | 1.33                                                                    | 37.1                                        | 0.74                                          | [4]              |
| Mn-MOF-74 <sup>2</sup>              | 7.09                          | 5.4                           | 1.31                                                                    | 21.2                                        | 1.52                                          | [4]              |
| <b>MIL-101(Cr)_DAA <sup>3</sup></b> | <b>7.60</b>                   | <b>6.55</b>                   | <b>1.16</b>                                                             | <b>4.6</b>                                  | <b>5.33</b>                                   | <b>This work</b> |

<sup>1</sup> calculated at 323 K

<sup>2</sup> calculated at 298 K

<sup>3</sup> calculated at 303 K

<sup>4</sup> calculated at 30 kPa

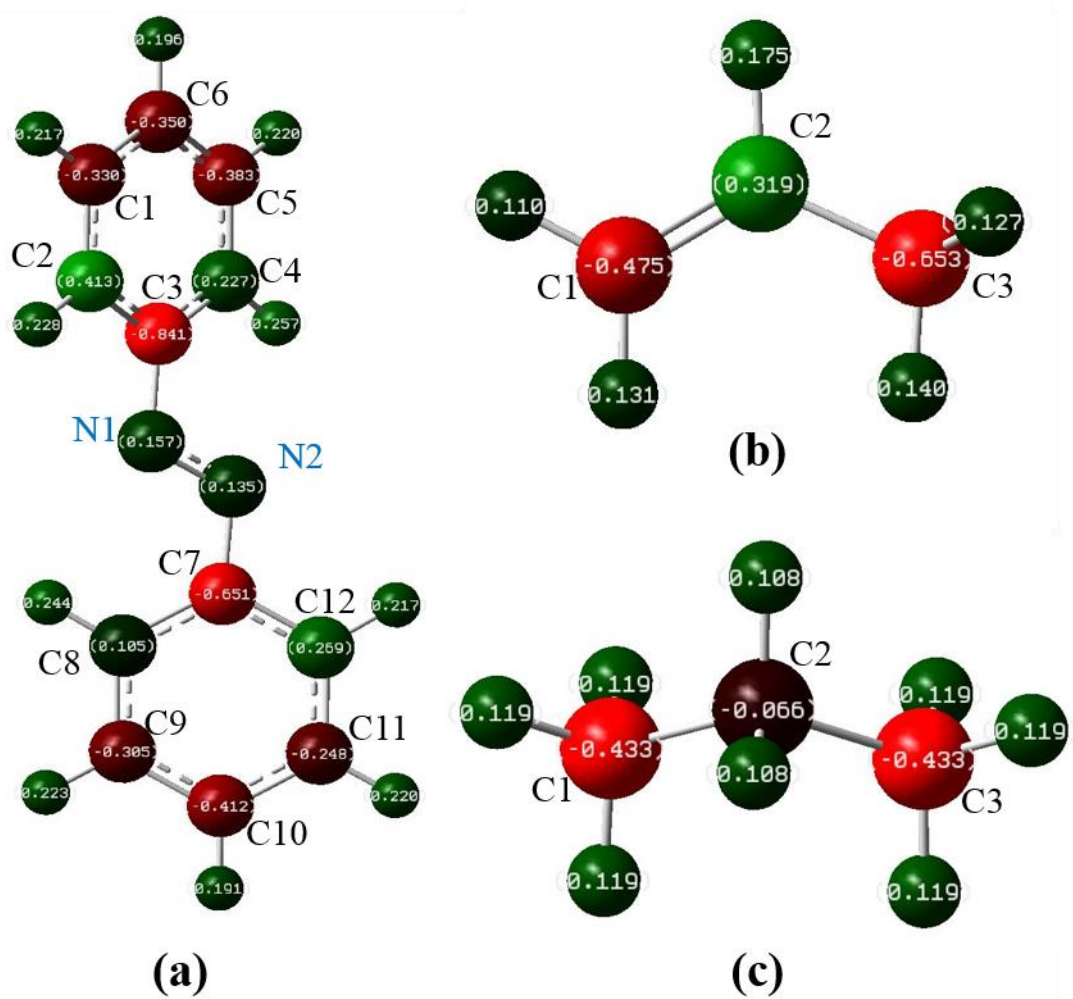

**Figure S1.** Atomic charge distributions of individual molecules; (a) azobenzene, (b) propylene, (c) propane.

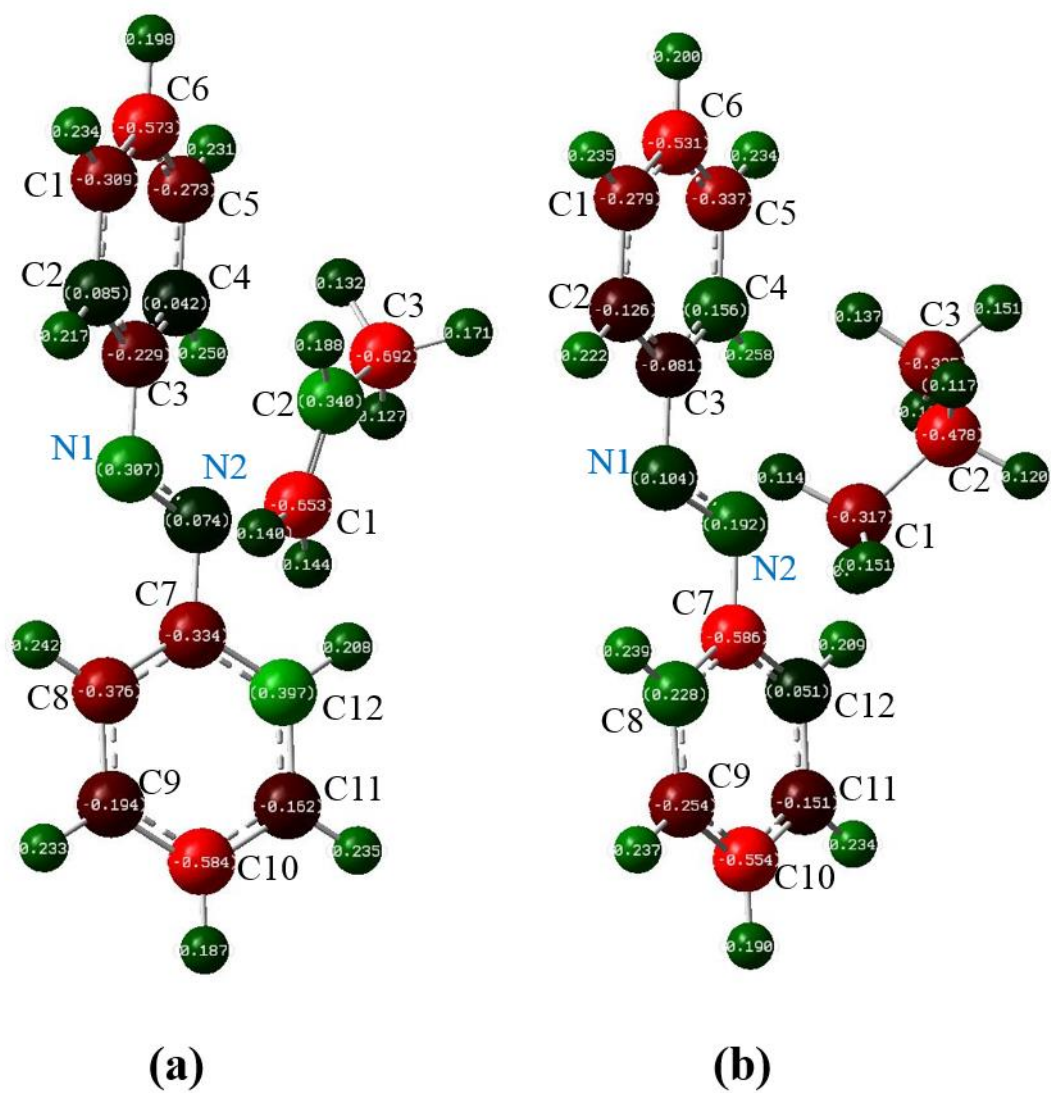

**Figure S2.** Atomic charge distributions of complexes; (a) azobenzene - propylene, (b) azobenzene - propane. In both structures, N1 and C1 are the closest atoms between Azob and propylene or propane.

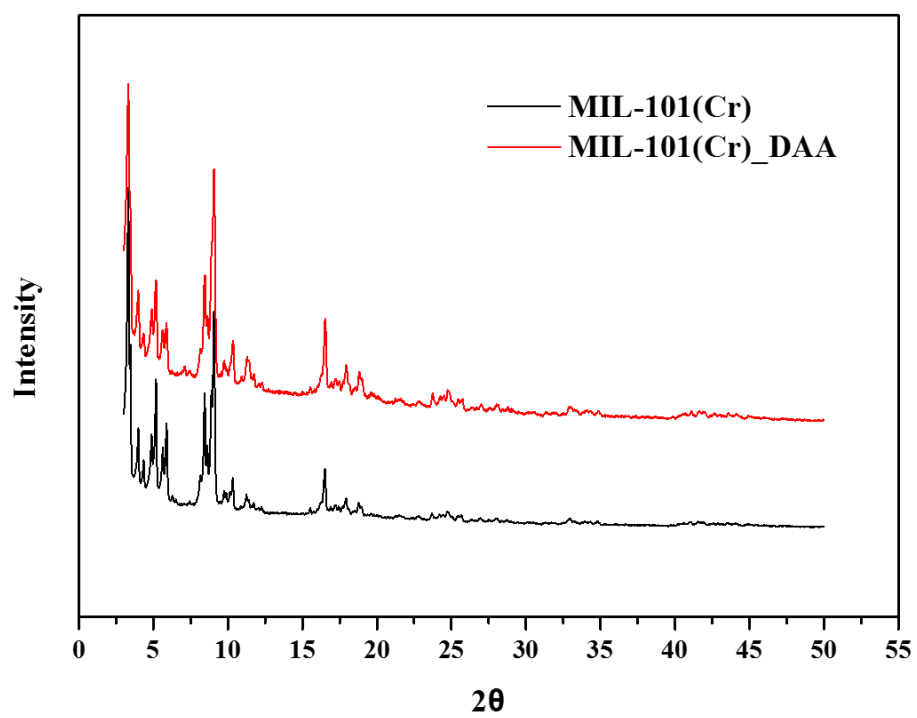

**Figure S3.** PXRD patterns for MIL-101(Cr) and MIL-101(Cr)\_DAA.

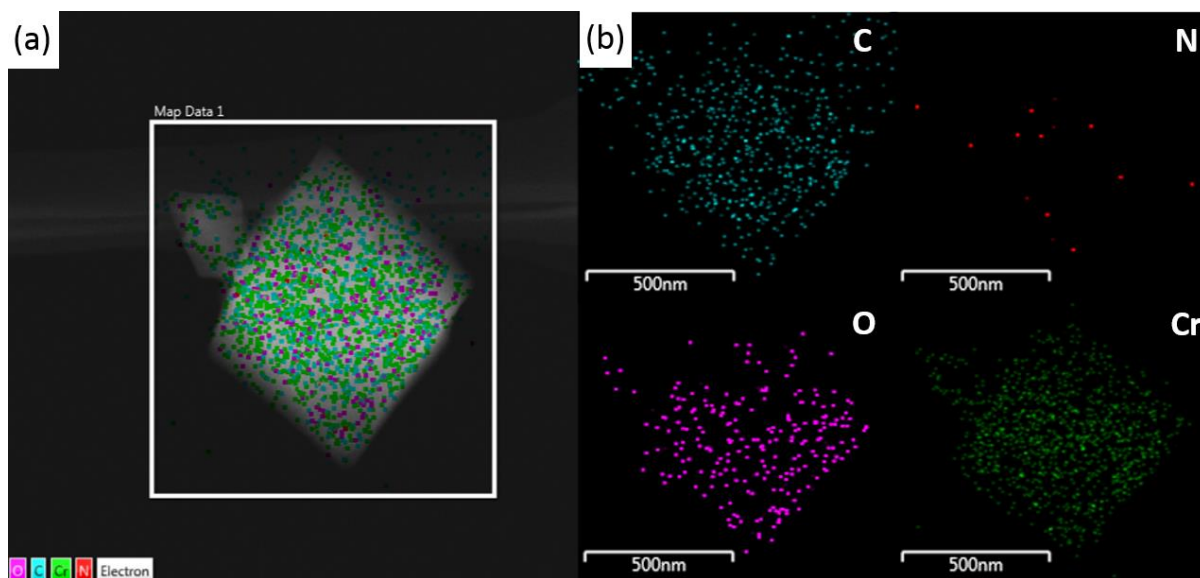

**Figure S4.** (a) A STEM image of MIL-101(Cr) and (b) corresponding EDS mappings of C (cyan), N (red), O (purple) and Cr (green).

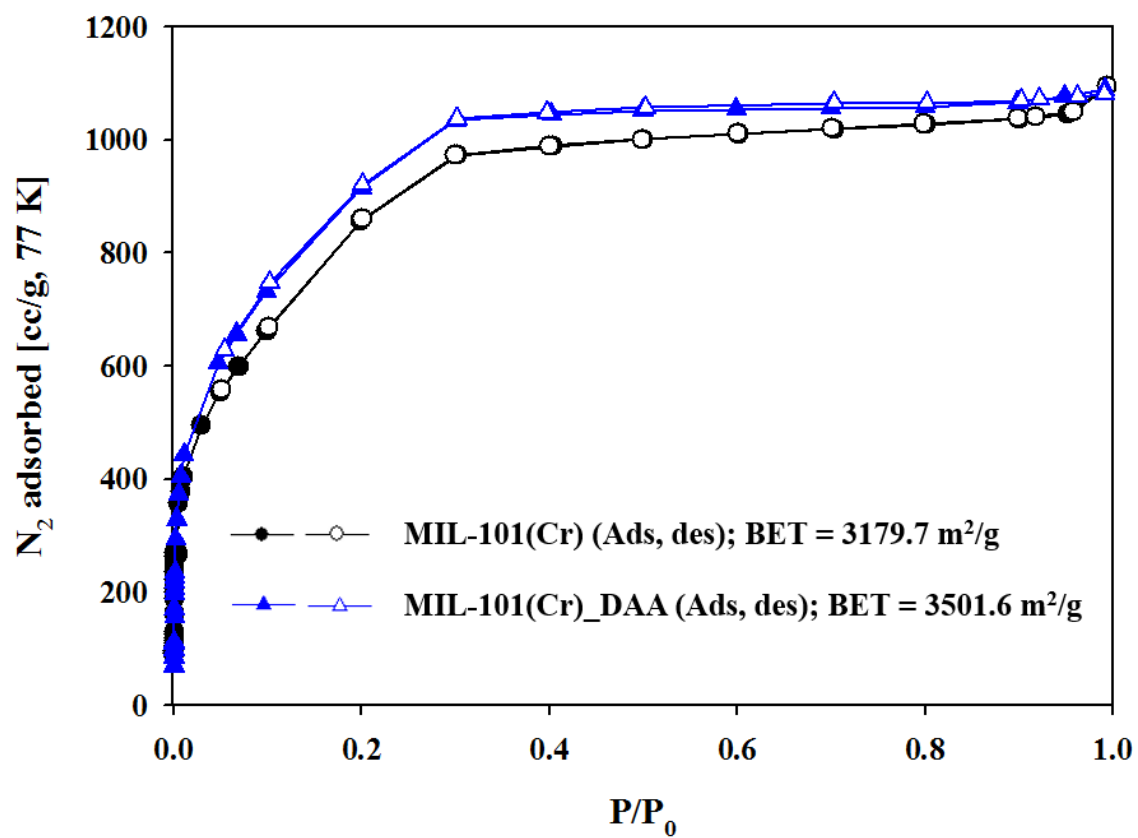

**Figure S5.**  $N_2$  isotherms of MIL-101(Cr) and MIL-101(Cr)\_DAA at 77 K. Calculated BET surface areas are also given in the figure.



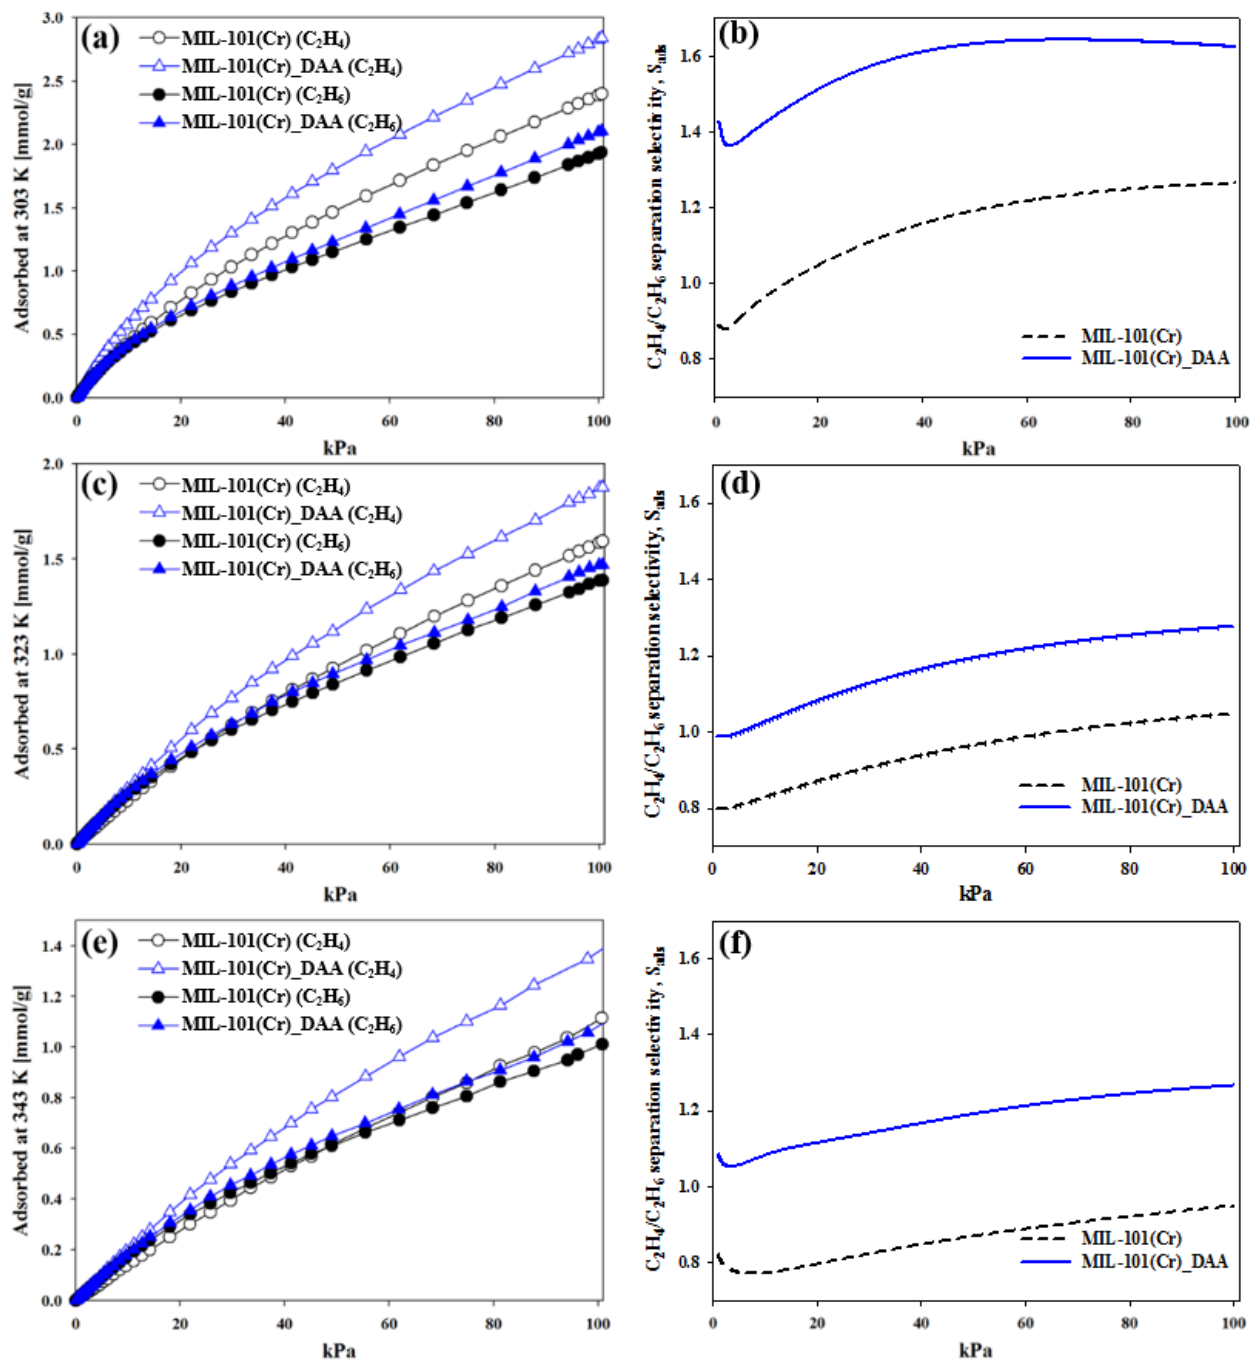

**Figure S6.** Single component gas adsorption isotherms of MIL-101(Cr) and MIL-101(Cr)\_DAA for ethylene and ethane at (a) 303 K, (c) 323 K and (e) 343 K. IAST-predicted ethylene/ethane selectivities at (b) 303 K, (d) 323 K and (f) 343 K.

## Reference

- [1] Campo, M. C.; Ribeiro, A. M.; Ferreira, A.; Santos, J. C.; Lutz, C.; Loureiro, J. M.; Rodrigues, A. E. New 13X zeolite for propylene/propane separation by vacuum swing adsorption. *Sep. Purif. Technol.* **2013**, 103, 60-70.
- [2] Plaza, M. G.; Ferreira, A. F. P.; Santos, J. C.; Ribeiro, A. M.; Müller, U.; Trukhan, N.; Loureiro, J. M.; Rodrigues, A. E. Propane/propylene separation by adsorption using shaped copper trimesate MOF. *Micropor. Mesopor. Mater.* **2012**, 157, 101-111.
- [3] Kim, A.-R.; Yoon, T.-U.; Kim, E.-J.; Yoon, J. W.; Kim, S.-Y.; Yoon, J. W.; Hwang, Y. K.; Chang, J.-S.; Bae, Y.-S. Facile loading of Cu(I) in MIL-100(Fe) through redox-active Fe(II) sites and remarkable propylene/propane separation performance. *Chem. Eng. J.* **2018**, 331, 777-784.
- [4] Bae, Y.-S.; Lee, C. Y.; Kim, K. C.; Farha, O. K.; Nickias, P.; Hupp, J. T.; Nguyen, S. T.; Snurr, R. Q. High Propene/Propane Selectivity in Isostructural Metal-Organic Frameworks with High Densities of Open Metal Sites. *Angew. Chem. Int. Ed.* **2012**, 51, 1857-1860.
